# Supplementary material
Source: MDPI journal article supplement (https://www.mdpi.com/2673-9984/2/1/4)
Supplement: s1 [file s1]

**ECU  
2021**

# The 1st Electronic Conference on Universe

22–28 FEBRUARY 2021 | ONLINE

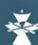

*universe*

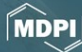

## **Can extra dimension pull space-time?**

**Vijay Singh**

**Department of Mathematical Sciences,  
University of Zululand,  
Kwa-Dlangezwa-3886, S. Africa**

# Plan of talk

- 1 Motivation
- 2 Model and field equations
- 3 Vacuum energy model
- 4 Summary

# Motivation

- Observable Universe is  $4D$ , flat, isotropic and homogeneous.
- Unifying gravity with other fundamental forces is an active field of research (*Ishihara, Prog. Theor. Phys.* **72** 376 1984).
- Among common origin of fundamental interactions **higher dimensional Kaluza-Klein (K-K) theories** is one of the possibility (*Appelquist and Chodos, PRD* **28** 272 1987).
- Dimensions of space-time may be greater than observed ( $3 + 1$ ).
- **Extra dimensions are not observed at present** presumably because their typical dimensions are of Planck length.
- Higher dimensional theories are not restricted to particle physics, but extend to classical and modern cosmology (*Overduin and Wesson, Phys. Rep.* **283** 303 1997).
- Early studies carried out in a variable-gravity theory in which there is only one extra dimension related to the rest mass (*Wesson, Astron. Astrophys.* **119** 145 1983, *GRG* **16** 193 1984).

- When an extra dimension is added to the  $4D$  space-time, the theory becomes much richer in its physical consequences, **BUT** at the same time mathematical complications increase.
- It becomes difficult to obtain exact solutions of Einstein's equations, in general.
- Many attempted have been made to find solutions of homogenous and non-homogenous models in different context.
- $4D$  space-time of Einstein's theory can be regarded as embedded in  $5D$  space-time (*Chodos and Detweiler, PRD 21 2167 1980*).
- Consider  $5D$  analogs of the spatially-flat  $4D$  FRW model of standard cosmology.
- Find some general and particular solutions of Einstein's equation in a very straight forward manner assuming the perfect fluid equation of state (EoS).

# Model and the field equations

- 5D K-K line element

$$ds^2 = -dt^2 + A^2(dx^2 + dy^2 + dz^2) + B^2d\chi^2.$$

$A$  &  $B \rightarrow$  Functions of  $t$ .

- Energy-momentum tensor for the perfect fluid

$$T_{\mu\nu} = (\rho + p)u_\mu u_\nu + pg_{\mu\nu}, \quad \mu, \nu = 0, 1, 2, 3, 4.$$

$\rho \rightarrow$  Energy density.

$p \rightarrow$  Pressure.

# Field equations of $5D$ analogs of $4D$ spacetime

$$R_{\mu\nu} - \frac{1}{2}g_{\mu\nu}R = -T_{\mu\nu}, \quad \mu, \nu = 0, 1, 2, 3, 4.$$

$$8\pi G = 1 = c.$$

- Manna and Bhui, (*Astrophys. Space Sci.*, **213** 299 1994) obtained solutions of these equations for the metric we have considered assuming a time dependent EoS and **NO excitation in the extra space**, so that  $p_4 = 0$ .
- We consider that the **pressure in the direction of extra space as usual  $3D$  space**, i.e.,  $p_4 = p$ .

# Evolution equations

$$3 \left( \frac{\dot{A}}{A} \right)^2 + 3 \frac{\dot{A}\dot{B}}{AB} = \rho,$$

$$2 \frac{\ddot{A}}{A} + \frac{\ddot{B}}{B} + \left( \frac{\dot{A}}{A} \right)^2 + 2 \frac{\dot{A}\dot{B}}{AB} = -p,$$

$$3 \frac{\ddot{A}}{A} + 3 \left( \frac{\dot{A}}{A} \right)^2 = -p.$$

A 'dot' stands for  $\frac{d}{dt}$ .

► Three independent equations with four unknowns  $A$ ,  $B$ ,  $\rho$  and  $p$ .

# Solutions

Assumption  $\rightarrow$  universe is filled with vacuum energy

$$p = -\rho.$$

We find

$$B = \frac{\dot{A}}{\alpha}$$

$\alpha \Rightarrow$  Integration constant.

- It represents the most general solution of 5D K-K homogenous model filled with a perfect fluid.



$$A_1(t) = \frac{e^{-\sqrt{c_2}t}}{2} \left( 2\gamma + \frac{e^{4\sqrt{c_2}t}}{c_2} \right)^{\frac{1}{2}},$$

$$A_2(t) = \frac{(2\gamma e^{2\sqrt{c_2}t} + e^{-2\sqrt{c_2}t})^{\frac{1}{2}}}{2\sqrt{c_2}},$$

$$B_1(t) = \frac{e^{-\sqrt{c_2}t} (e^{4\sqrt{c_2}t} - 2c_2\gamma)}{2\alpha (2c_2\gamma + e^{4\sqrt{c_2}t})^{\frac{1}{2}}},$$

$$B_2(t) = \frac{e^{-2\sqrt{c_2}t} (2c_2\gamma e^{4\sqrt{c_2}t} - 1)}{2\alpha (2c_2\gamma e^{2\sqrt{c_2}t} + e^{-2\sqrt{c_2}t})^{\frac{1}{2}}},$$

where  $\gamma = \alpha\beta$ ,  $\alpha \neq 0$  and  $c_2 > 0$  is constant of integration.

- $\rho = 6c_2 = -p \Rightarrow c_2$  acts as a cosmological constant.

# Evolution of 3-space

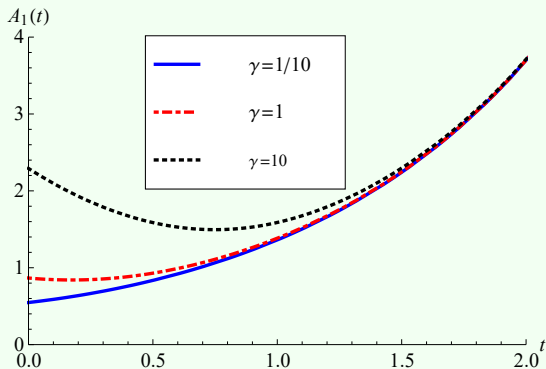

Figure:  $B$  versus  $t$  with  $c_2 = 1$ .

# Behavior of extra dimension

When  $\alpha > 0$

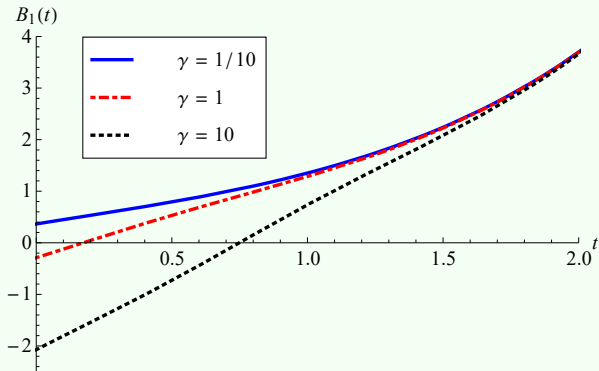

Figure:  $B$  versus  $t$  with  $c_2 = 1 = \alpha$  and  $\beta = -1$ .

# Behavior of extra dimension

When  $\alpha < 0$

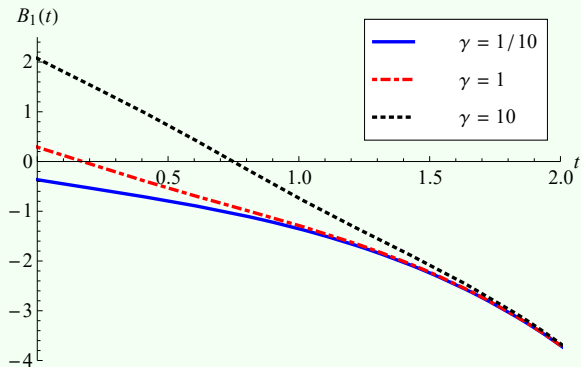

Figure:  $B$  versus  $t$  with  $c_2 = 1 = \beta$  and  $\alpha = -1$ .

# Deceleration parameter

$$q_1 = -\frac{16c_2^4\gamma^4 - 56c_2^2\gamma^2 e^{8\sqrt{c_2}t} + e^{16\sqrt{c_2}t}}{(4c_2^2\gamma^2 + e^{8\sqrt{c_2}t})^2}$$

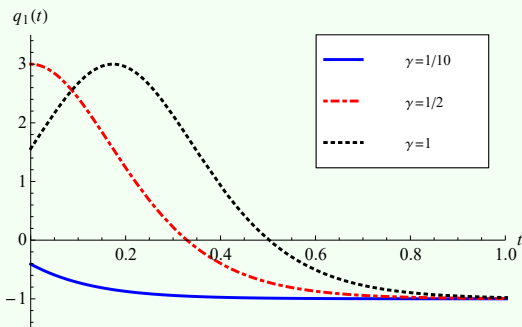

Figure:  $q_1$  versus  $t$  for different values of  $\gamma$  with  $c_2 = 1$ .

# Cause of transition from dec. to acc.

- Possibility I: Matter manifestation due to extra space?

$$3 \left( \frac{\dot{A}}{A} \right)^2 = \rho + \rho_1,$$

$$2 \frac{\ddot{A}}{A} + \left( \frac{\dot{A}}{A} \right)^2 = \rho - p_1,$$

$$\frac{\ddot{A}}{A} + \left( \frac{\dot{A}}{A} \right)^2 = \rho,$$

where  $\rho_1 = -3 \frac{\dot{A}\dot{B}}{AB}$  and  $p_1 = \frac{\ddot{B}}{B} + 2 \frac{\dot{A}\dot{B}}{AB}$ , can be regarded as the energy density and pressure of the matter manifested from the geometry of extra space.

$$\rho_1 = -\frac{3c_2 (4c_2^2\gamma^2 + 12c_2\gamma e^{4\sqrt{c_2}t} + e^{8\sqrt{c_2}t})}{(2c_2\gamma + e^{4\sqrt{c_2}t})^2},$$

$$p_1 = \frac{c_2 (12c_2^2\gamma^2 + 4c_2\gamma e^{4\sqrt{c_2}t} + 3e^{8\sqrt{c_2}t})}{(2c_2\gamma + e^{4\sqrt{c_2}t})^2}.$$

- $c_2$  must be negative for  $\rho_1 > 0$ , which contradicts as  $c_2 > 0$ .
- The hypothesis of manifestation of matter from the geometry of the extra dimension is **REJECTED**.
- However,  $p_1 > 0$ , which shows that the **extra dimension generates some attraction force similar to gravity**.
- This **attraction force causes past deceleration**.

# Extra dimension contracts or expands?

- If  $\beta = 0$ , then  $A_1 \propto e^{\sqrt{c_2}t}$ ,  $B_1 \propto \frac{e^{\sqrt{c_2}t}}{\alpha}$  and  $q_1 = -1$ .
- Ever accelerating model that evolves isotopically.
- Early **decelerated phase is possible only for non zero values of  $\beta$** .
- A non-vanishing  $\beta$  causes anisotropy.
- The dynamics of the **deceleration parameter remains unaffected** for positive or negative values of  $\alpha$ .
- Therefore, it is difficult to say that the early deceleration is caused whether by the contraction or expansion of extra space.
- Shrinking fifth dimension is physically more relevant.
- Whatever the possibility could be but **extra dimension causes the transition from decelerating to accelerating universe**.



# Summary

- General solutions of 5D K-K model filled with vacuum energy.
- The model describes transition from decelerated to accelerated phase.
- Extra dimension causes early decelerated phase.
- An alternative resolution of a sudden change from deceleration to acceleration.
- Anisotropic at early times but becomes isotropic at late times.
- Straight forward method to solve the field equations can make it useful in future similar studies.

# Summary

- General solutions of 5D K-K model filled with vacuum energy.
- The model describes transition from decelerated to accelerated phase.
- Extra dimension causes early decelerated phase.
- An alternative resolution of a sudden change from deceleration to acceleration.
- Anisotropic at early times but becomes isotropic at late times.
- Straight forward method to solve the field equations can make it useful in future similar studies.

# Summary

- General solutions of 5D K-K model filled with vacuum energy.
- The model describes transition from decelerated to accelerated phase.
- Extra dimension causes early decelerated phase.
- An alternative resolution of a sudden change from deceleration to acceleration.
- Anisotropic at early times but becomes isotropic at late times.
- Straight forward method to solve the field equations can make it useful in future similar studies.

# Summary

- General solutions of 5D K-K model filled with vacuum energy.
- The model describes transition from decelerated to accelerated phase.
- Extra dimension causes early decelerated phase.
- **An alternative resolution of a sudden change from deceleration to acceleration.**
- Anisotropic at early times but becomes isotropic at late times.
- Straight forward method to solve the field equations can make it **useful in future** similar studies.

# Summary

- General solutions of 5D K-K model filled with vacuum energy.
- The model describes transition from decelerated to accelerated phase.
- Extra dimension causes early decelerated phase.
- **An alternative resolution of a sudden change from deceleration to acceleration.**
- Anisotropic at early times but becomes isotropic at late times.
- Straight forward method to solve the field equations can make it **useful in future** similar studies.

# Summary

- General solutions of 5D K-K model filled with vacuum energy.
- The model describes transition from decelerated to accelerated phase.
- Extra dimension causes early decelerated phase.
- **An alternative resolution of a sudden change from deceleration to acceleration.**
- Anisotropic at early times but becomes isotropic at late times.
- Straight forward method to solve the field equations can make it **useful in future** similar studies.

# Thank You!

- General solutions of 5D K-K model with perfect fluid EoS.
- The model describes transition from decelerated to accelerated phase.
- Extra dimension causes early decelerated phase.
- An alternative resolution of a sudden change from deceleration to acceleration.
- Anisotropic at early times but becomes isotropic at late times.
- Straight forward method to solve the field equations can make it useful in future similar studies.

Further interaction: [gtrcosmo@gmail.com](mailto:gtrcosmo@gmail.com)

# Thank You!

- General solutions of 5D K-K model with perfect fluid EoS
- The model describes transition from decelerated to accelerated phase.
- Extra dimension causes early decelerated phase.
- An alternative resolution of a sudden change from deceleration to acceleration.
- Anisotropic at early times but becomes isotropic at late times.
- Straight forward method to solve the field equations can make it useful in future similar studies.

Further interaction: [gtrcosmo@gmail.com](mailto:gtrcosmo@gmail.com)
